# Supplementary material for: Photophysical Properties of Protoporphyrin IX, Pyropheophorbide-a, and Photofrin® in Different Conditions
Source: PubMed Central journal article supplement (PMC7914864; doi:10.3390/ph14020138), 2021-02-09
Supplement: pharmaceuticals-14-00138-s001.pdf [file pharmaceuticals-14-00138-s001.pdf]

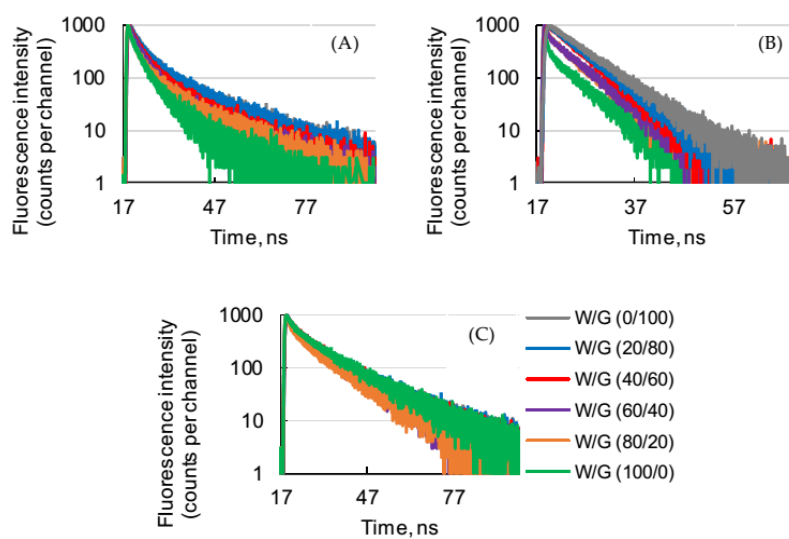

**Figure S1.** Fluorescence decay of PpIX (A), PPa (B) and PF (C) in water/glycerol mixture ( $\lambda_{\text{exc}} = 408 \text{ nm}$ ,  $C = 3.1 \mu\text{M}$ ).

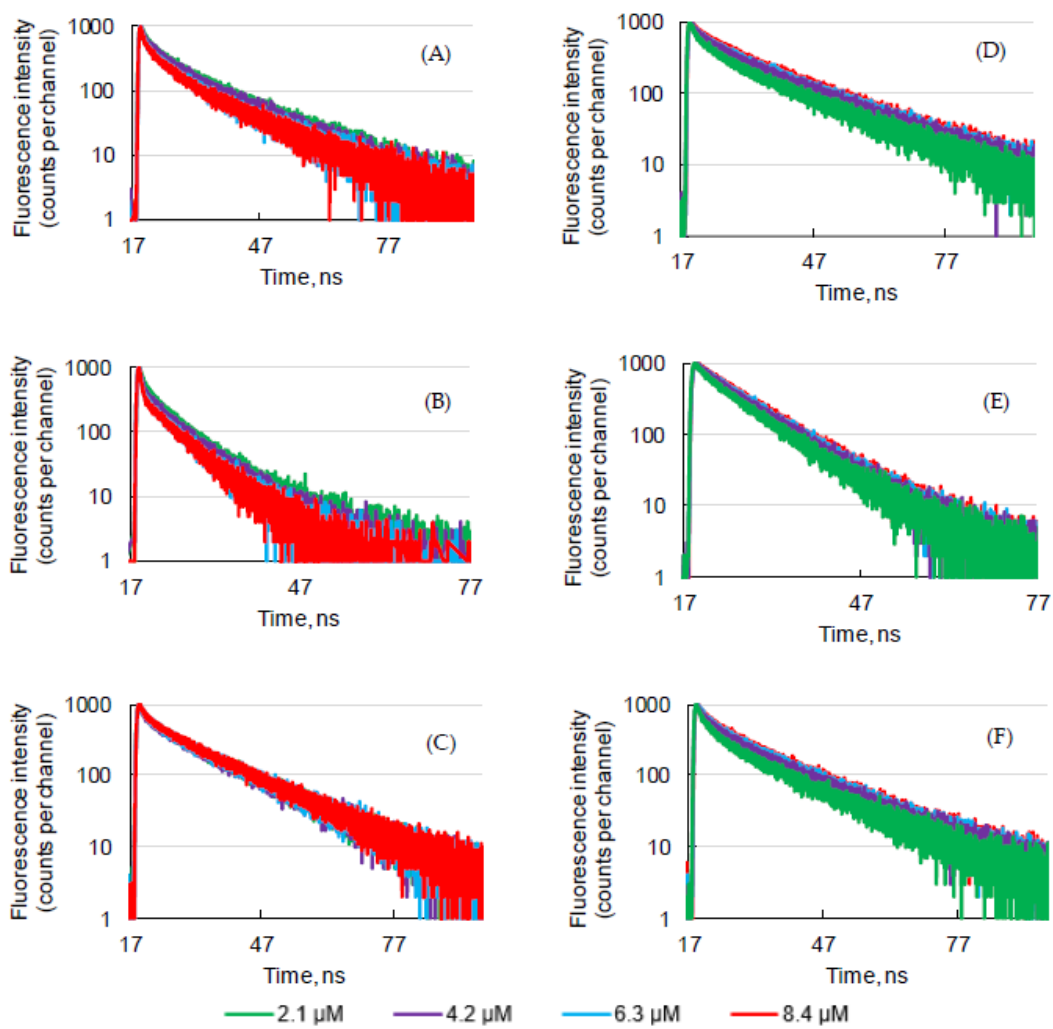

**Figure S2.** Fluorescence decay of PpIX (A, D), PPa (B, E), PF (C, F) in PBS and FBS at different concentrations ( $\lambda_{exc} = 408 \text{ nm}$ ).

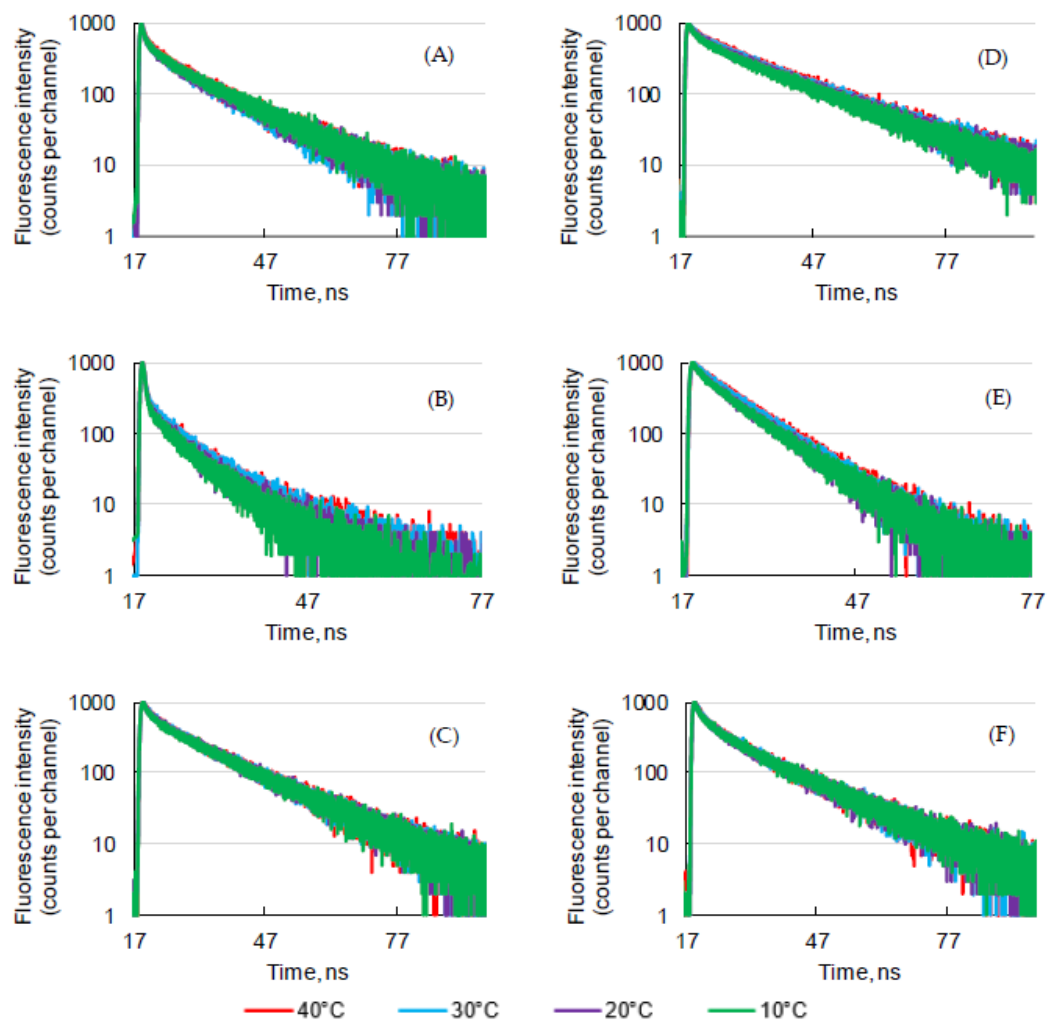

**Figure S3.** Fluorescence decay of PpIX (A, D), PPa (B, E), PF (C, F) in PBS and FBS at different temperatures ( $\lambda_{exc} = 408 \text{ nm}$ ,  $C = 3.1 \text{ } \mu\text{M}$ ).

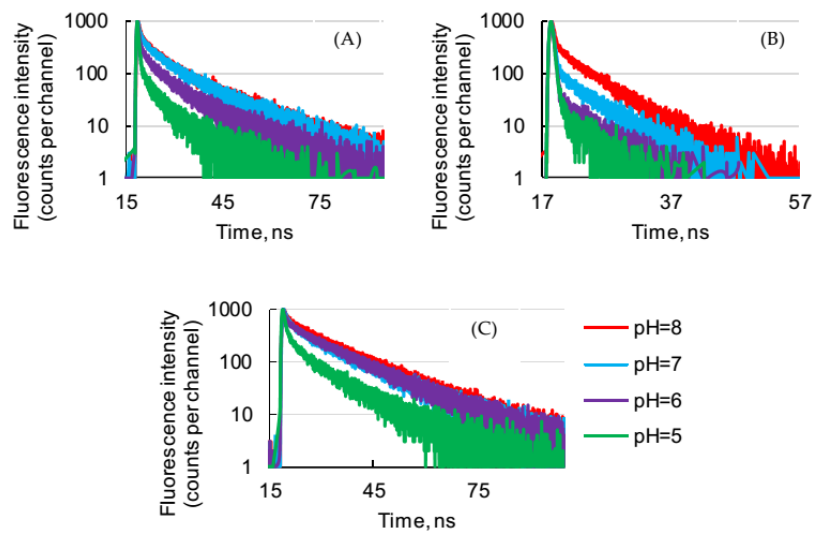

**Figure S4.** Fluorescence decay of PpIX (A), PPa (B) and PF (C) in PBS under different pH ( $\lambda_{exc} = 408 \text{ nm}$ ,  $C = 3.1 \text{ }\mu\text{M}$ ).

**Table S1.** Fluorescence emission bands (nm) of PpIX, PPa and PF in different solvents (C=1.87  $\mu$ M).

| Solvent  | Protoporphyrin IX<br>( $\lambda_{exc} = 400$ nm) |        | Pyropheophorbide a<br>( $\lambda_{exc} = 415$ nm) |        | Photofrin<br>( $\lambda_{exc} = 400$ nm) |        |
|----------|--------------------------------------------------|--------|---------------------------------------------------|--------|------------------------------------------|--------|
|          | 1 band                                           | 2 band | 1 band                                            | 2 band | 1 band                                   | 2 band |
| Toluene  | 635                                              | 704    | 675                                               | 722    | 633                                      | 696    |
| AcOEt    | 632                                              | 701    | 672                                               | 718    | 629                                      | 694    |
| EtOH     | 632                                              | 701    | 673                                               | 719    | 629                                      | 694    |
| MeOH     | 631                                              | 698    | 672                                               | 719    | 628                                      | 693    |
| Glycerol | 630                                              | 693    | 675                                               | 723    | 625                                      | 690    |
| Water    | 622                                              | 685    | 672                                               | 719    | 617                                      | 678    |
| PBS      | 621                                              | 686    | 672                                               | 719    | 617                                      | 678    |
| FBS      | 625                                              | 691    | 678                                               | 727    | 628                                      | 695    |
